# Supplementary material
Source: HighWire-hosted journal article supplement (https://jnm.snmjournals.org/highwire/filestream/95576/field_highwire_adjunct_files/0/226712_Supplemental_Data.pdf)
Supplement: 226712_Supplemental_Data.pdf [file 226712_Supplemental_Data.pdf]

# Supplemental Figure 1

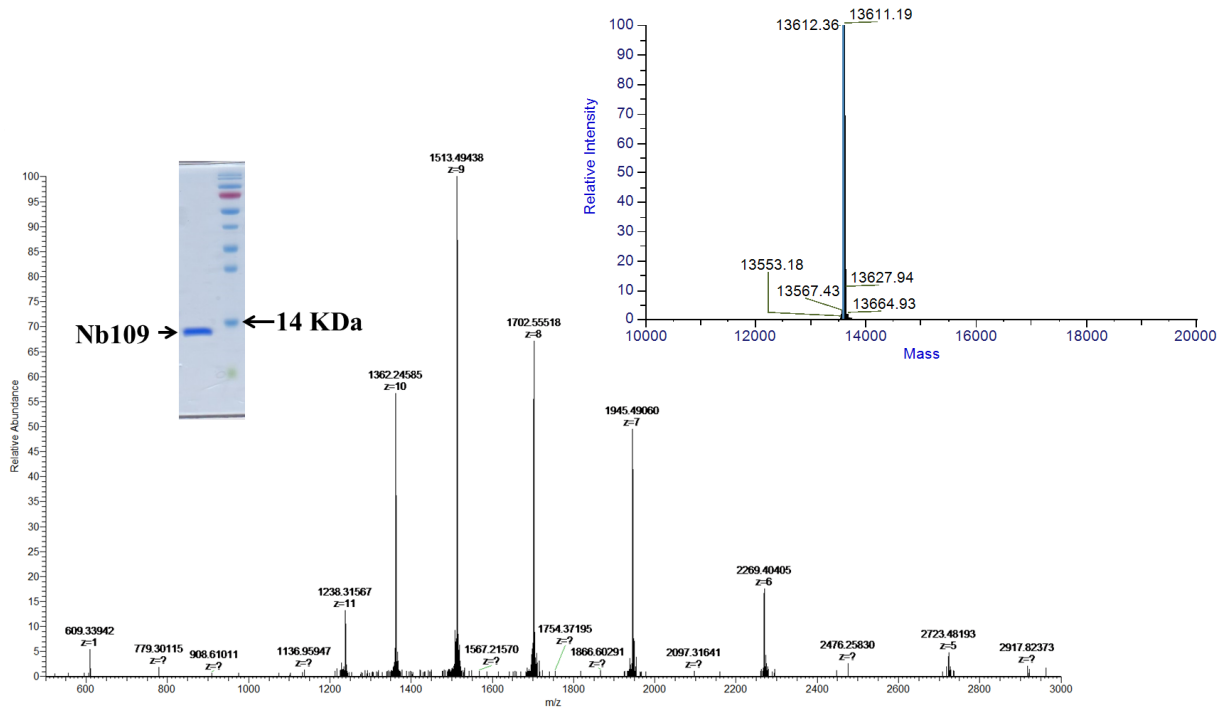

Supplemental Figure 1 The SDS-PAGE and ESI-Q-TOF-MS characterization of Nb109.

## Supplemental Figure 2

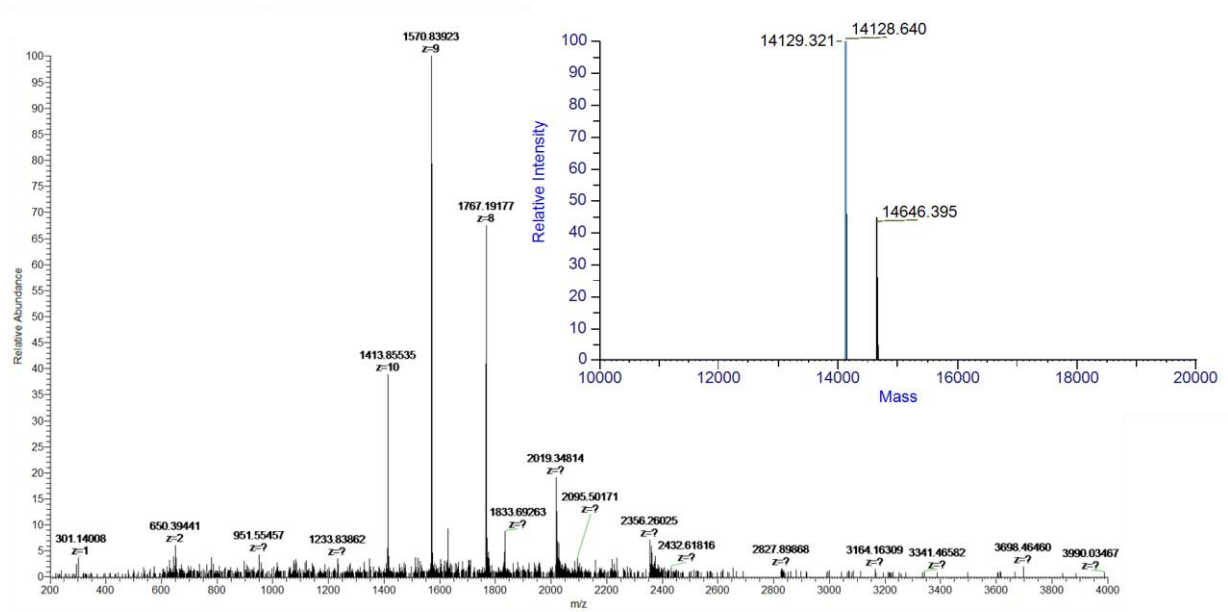

Supplemental Figure 2 The ESI-Q-TOF-MS of NOTA-Nb109.

### Supplemental Figure 3

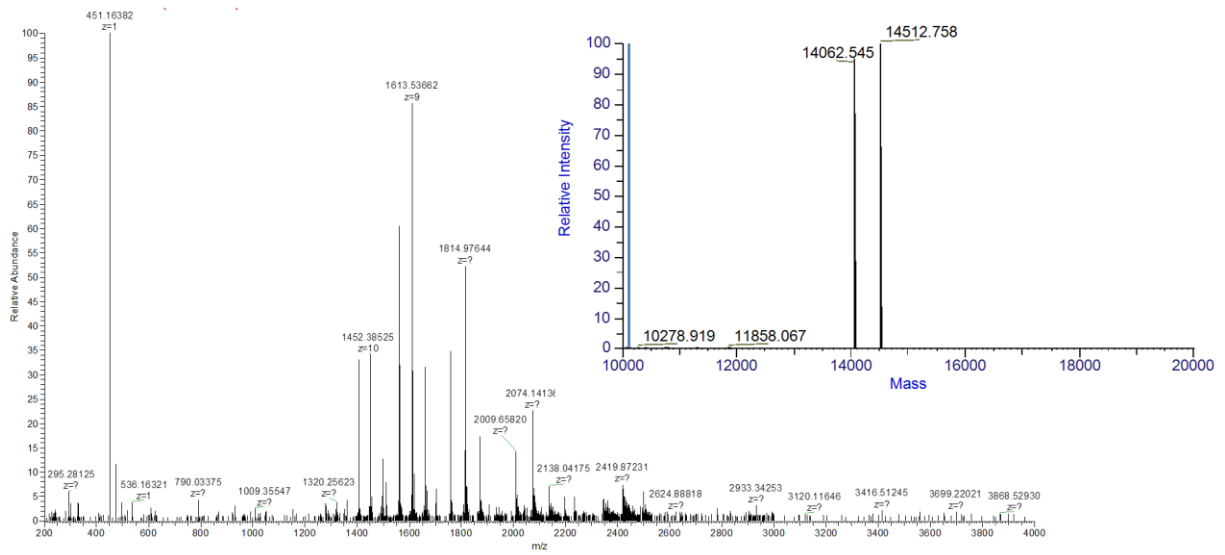

Supplemental Figure 3 The ESI-Q-TOF-MS of  $^{69}\text{Ga-NOTA-Nb109}$ .

## Supplemental Figure 4

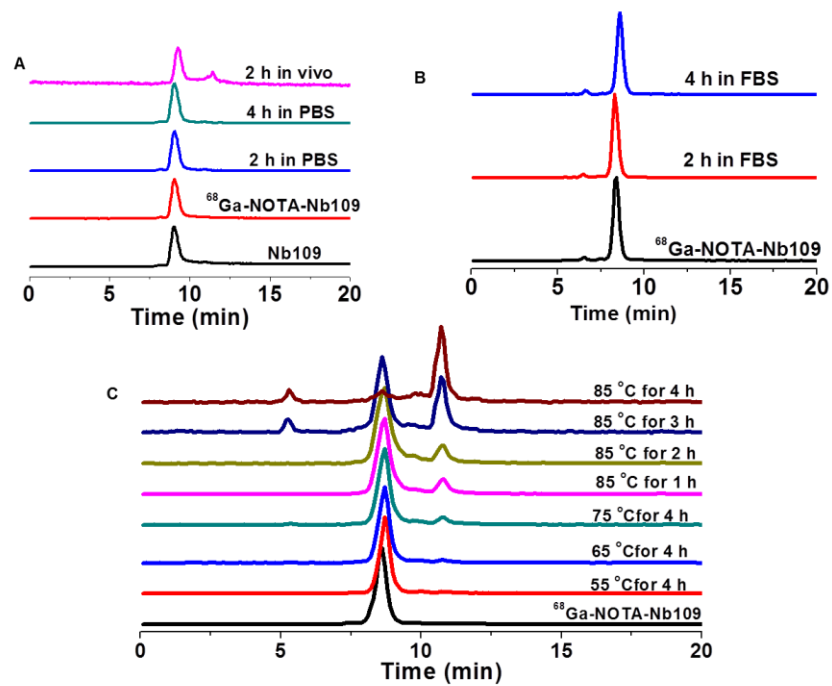

**Supplemental Figure 4** In vitro stability of  $^{68}\text{Ga-NOTA-Nb109}$  in (A) PBS (pH 7.4) and urine and (B) fetal bovine serum (FBS) at different time under 37 °C; (C) the thermal stability of  $^{68}\text{Ga-NOTA-Nb109}$  under different temperature. Nb109: UV detector (320 nm),  $^{68}\text{Ga-NOTA-Nb109}$ : radioactive detector.

Supplemental Figure 5

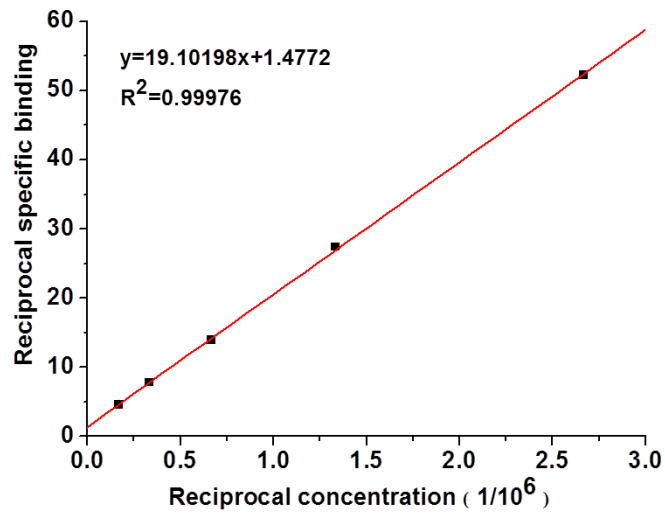

Supplemental Figure 5 The immunoreactivity assay of <sup>68</sup>Ga-NOTA-Nb109.

Supplemental Figure 6

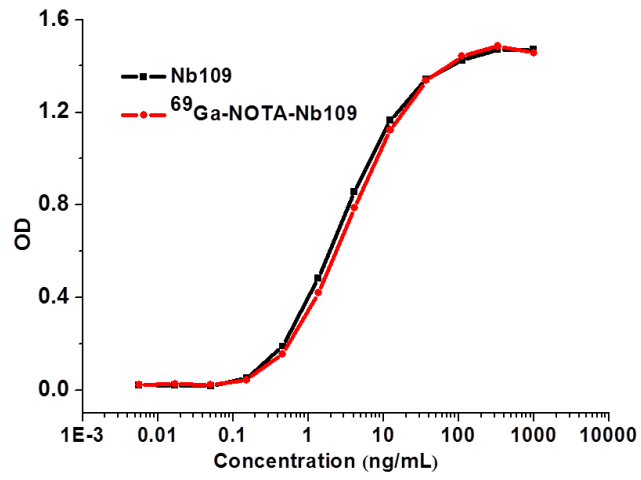

**Supplemental Figure 6** The binding curves of Nb109 (black) and <sup>68</sup>Ga-NOTA-Nb109 (red) to PD-L1 assessed by ELISA.

**Supplemental Figure 7**

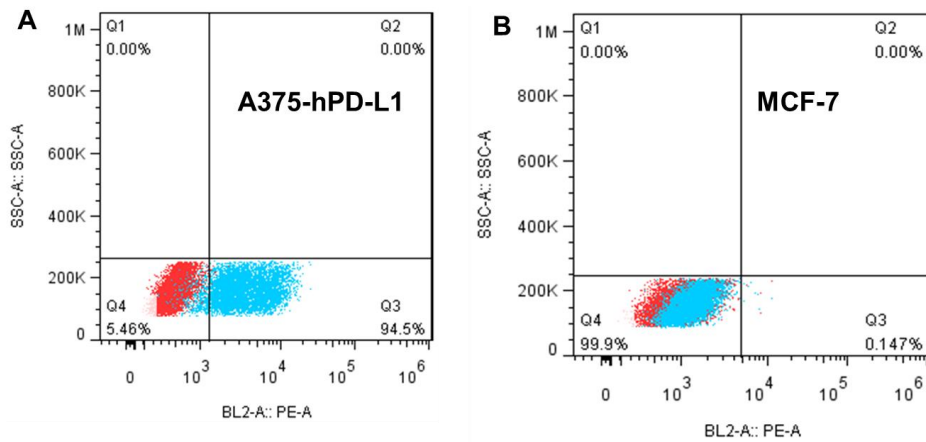

**Supplemental Figure 7** The expression of PD-L1 in A375-hPD-L1 (A) and MCF-7 (B) cell lines measured by flow cytometry.

**Supplemental Figure 8**

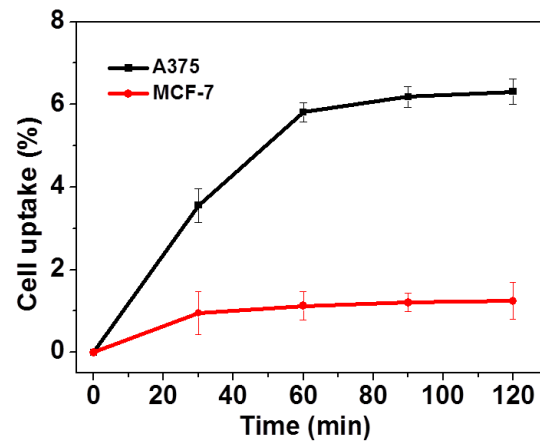

**Supplemental Figure 8** The cellular uptake of <sup>68</sup>Ga-NOTA-Nb109 in A375-hPD-L1 (black) and MCF-7 (red)

cell lines at different time points.



### Supplemental Figure 9

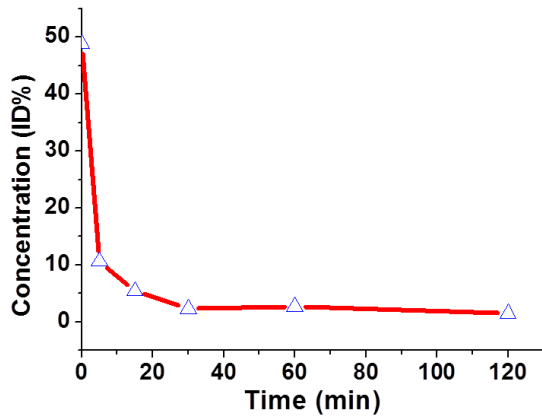

| Parameter     | Unit                  | Value  |
|---------------|-----------------------|--------|
| $t_{1/2}$     | min                   | 49.79  |
| $T_{max}$     | min                   | 0.10   |
| $C_{max}$     | ID%                   | 48.82  |
| $C_0$         | ID%                   | 50.37  |
| $AUC_{0-t}$   | ID%*min               | 487.03 |
| $AUC_{0-inf}$ | ID%*min               | 593.39 |
| $MRT_{0-inf}$ | min                   | 60.53  |
| $V_z$         | ( $\mu$ ci)/(ID%)     | 11.41  |
| CL            | ( $\mu$ ci)/(ID%)/min | 0.15   |
| $V_{ss}$      | ( $\mu$ ci)/(ID%)     | 9.61   |

**Supplemental Figure 9** The pharmacokinetic behavior of  $^{68}\text{Ga}$ -NOTA-Nb109.

## Supplemental Figure 10

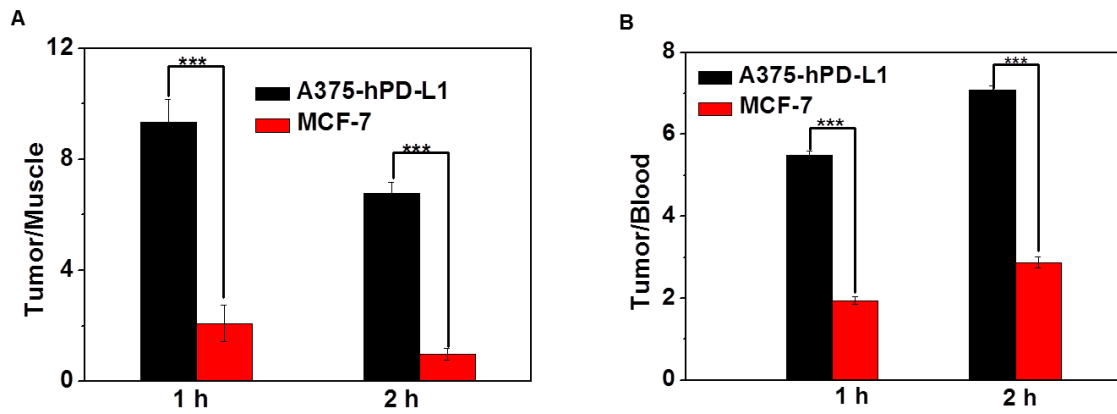

**Supplemental Figure 10** The tumor-to-muscle (A) and tumor-to-blood (B) ratios at 1 h and 2 h post injection of  $^{68}\text{Ga}$ -NOTA-Nb109 in tumor-bearing models, respectively. \*\*\*,  $p < 0.001$ .
